# Supplementary material for: Construction and Clinical Translation of Causal Pan-Cancer Gene Score Across Cancer Types
Source: Front Genet. 2021 Dec 23;12:784775. doi: 10.3389/fgene.2021.784775 (PMC8733729; doi:10.3389/fgene.2021.784775)
Supplement: Supplementary file 2 [file DataSheet2.xlsx]

## Sheet: Table S1
	Table S1 Sample size of the TCGA training and test set
	Cancer type	Training set sample size	Test set sample size
	ACC	49	16
	BLCA	267	56
	BRCA	597	148
	CHOL	22	9
	COAD	161	50
	ESCA	57	26
	HNSC	293	75
	KICH	50	6
	KIRC	369	90
	KIRP	146	35
	LIHC	132	33
	LUAD	319	72
	LUSC	270	74
	MESO	64	18
	PAAD	130	23
	READ	57	14
	SKCM	318	79
	STAD	157	52
	TGCT	97	21
	THCA	269	67
	UVM	49	5

## Sheet: Table S2
	Table S2 The detailed information of the causal SNPs and potential causal genes
	SNP	CHR	BP	Gene	P	Cancer	Position
	rs2736100	5	1286516	SLC6A19	9.45e-11	OV	Downstream
	rs2736100	5	1286516	SLC6A18	9.45e-11	OV	Downstream
	rs2736100	5	1286516	TERT	9.45e-11	OV	Intron
	rs2736100	5	1286516	CLPTM1L	9.45e-11	OV	Upstream
	rs2736100	5	1286516	SLC6A19	5.17e-06	UCEC	Downstream
	rs2736100	5	1286516	SLC6A18	5.17e-06	UCEC	Downstream
	rs2736100	5	1286516	TERT	5.17e-06	UCEC	Intron
	rs2736100	5	1286516	CLPTM1L	5.17e-06	UCEC	Upstream
	rs2735948	5	1299213	SLC6A19	1.45e-07	LC	Downstream
	rs2735948	5	1299213	SLC6A18	1.45e-07	LC	Downstream
	rs2735948	5	1299213	TERT	1.45e-07	LC	Downstream
	rs2735948	5	1299213	CLPTM1L	1.45e-07	LC	Upstream
	rs2735948	5	1299213	SLC6A3	1.45e-07	LC	Upstream
	rs2735948	5	1299213	SLC6A19	5.36e-10	MM	Downstream
	rs2735948	5	1299213	SLC6A18	5.36e-10	MM	Downstream
	rs2735948	5	1299213	TERT	5.36e-10	MM	Downstream
	rs2735948	5	1299213	CLPTM1L	5.36e-10	MM	Upstream
	rs2735948	5	1299213	SLC6A3	5.36e-10	MM	Upstream
	rs4975615	5	1315343	SLC6A19	8.72e-10	MM	Downstream
	rs4975615	5	1315343	SLC6A18	8.72e-10	MM	Downstream
	rs4975615	5	1315343	TERT	8.72e-10	MM	Downstream
	rs4975615	5	1315343	CLPTM1L	8.72e-10	MM	Upstream
	rs4975615	5	1315343	SLC6A3	8.72e-10	MM	Upstream
	rs4975616	5	1315660	SLC6A19	3.82e-11	MM	Downstream
	rs4975616	5	1315660	SLC6A18	3.82e-11	MM	Downstream
	rs4975616	5	1315660	TERT	3.82e-11	MM	Downstream
	rs4975616	5	1315660	CLPTM1L	3.82e-11	MM	Upstream
	rs4975616	5	1315660	SLC6A3	3.82e-11	MM	Upstream
	rs6554759	5	1317102	SLC6A19	1.58e-07	MM	Downstream
	rs6554759	5	1317102	SLC6A18	1.58e-07	MM	Downstream
	rs6554759	5	1317102	TERT	1.58e-07	MM	Downstream
	rs6554759	5	1317102	CLPTM1L	1.58e-07	MM	Upstream
	rs6554759	5	1317102	SLC6A3	1.58e-07	MM	Upstream
	rs421629	5	1320136	SLC6A19	3e-06	LC	Downstream
	rs421629	5	1320136	SLC6A18	3e-06	LC	Downstream
	rs421629	5	1320136	TERT	3e-06	LC	Downstream
	rs421629	5	1320136	CLPTM1L	3e-06	LC	Intron
	rs421629	5	1320136	SLC6A3	3e-06	LC	Upstream
	rs421629	5	1320136	SLC6A19	1.86e-12	MM	Downstream
	rs421629	5	1320136	SLC6A18	1.86e-12	MM	Downstream
	rs421629	5	1320136	TERT	1.86e-12	MM	Downstream
	rs421629	5	1320136	CLPTM1L	1.86e-12	MM	Intron
	rs421629	5	1320136	SLC6A3	1.86e-12	MM	Upstream
	rs380286	5	1320247	SLC6A19	3e-06	LC	Downstream
	rs380286	5	1320247	SLC6A18	3e-06	LC	Downstream
	rs380286	5	1320247	TERT	3e-06	LC	Downstream
	rs380286	5	1320247	CLPTM1L	3e-06	LC	Intron
	rs380286	5	1320247	SLC6A3	3e-06	LC	Upstream
	rs380286	5	1320247	SLC6A19	1.39e-12	MM	Downstream
	rs380286	5	1320247	SLC6A18	1.39e-12	MM	Downstream
	rs380286	5	1320247	TERT	1.39e-12	MM	Downstream
	rs380286	5	1320247	CLPTM1L	1.39e-12	MM	Intron
	rs380286	5	1320247	SLC6A3	1.39e-12	MM	Upstream
	rs10073340	5	1321873	SLC6A19	1.42e-07	MM	Downstream
	rs10073340	5	1321873	SLC6A18	1.42e-07	MM	Downstream
	rs10073340	5	1321873	TERT	1.42e-07	MM	Downstream
	rs10073340	5	1321873	CLPTM1L	1.42e-07	MM	Intron
	rs10073340	5	1321873	SLC6A3	1.42e-07	MM	Upstream
	rs401681	5	1322087	SLC6A19	3.66e-07	PAAD	Downstream
	rs401681	5	1322087	SLC6A18	3.66e-07	PAAD	Downstream
	rs401681	5	1322087	TERT	3.66e-07	PAAD	Downstream
	rs401681	5	1322087	CLPTM1L	3.66e-07	PAAD	Intron
	rs401681	5	1322087	SLC6A3	3.66e-07	PAAD	Upstream
	rs421284	5	1325590	SLC6A18	5.32e-13	MM	Downstream
	rs421284	5	1325590	TERT	5.32e-13	MM	Downstream
	rs421284	5	1325590	CLPTM1L	5.32e-13	MM	Intron
	rs421284	5	1325590	SLC6A3	5.32e-13	MM	Upstream
	rs465498	5	1325803	SLC6A18	2.49e-06	LC	Downstream
	rs465498	5	1325803	TERT	2.49e-06	LC	Downstream
	rs465498	5	1325803	CLPTM1L	2.49e-06	LC	Intron
	rs465498	5	1325803	SLC6A3	2.49e-06	LC	Upstream
	rs465498	5	1325803	SLC6A18	7.12e-13	MM	Downstream
	rs465498	5	1325803	TERT	7.12e-13	MM	Downstream
	rs465498	5	1325803	CLPTM1L	7.12e-13	MM	Intron
	rs465498	5	1325803	SLC6A3	7.12e-13	MM	Upstream
	rs452932	5	1330253	SLC6A18	2.55e-06	LC	Downstream
	rs452932	5	1330253	TERT	2.55e-06	LC	Downstream
	rs452932	5	1330253	CLPTM1L	2.55e-06	LC	Intron
	rs452932	5	1330253	SLC6A3	2.55e-06	LC	Upstream
	rs452932	5	1330253	SLC6A18	7.42e-13	MM	Downstream
	rs452932	5	1330253	TERT	7.42e-13	MM	Downstream
	rs452932	5	1330253	CLPTM1L	7.42e-13	MM	Intron
	rs452932	5	1330253	SLC6A3	7.42e-13	MM	Upstream
	rs452384	5	1330840	SLC6A18	2.44e-06	LC	Downstream
	rs452384	5	1330840	TERT	2.44e-06	LC	Downstream
	rs452384	5	1330840	CLPTM1L	2.44e-06	LC	Intron
	rs452384	5	1330840	SLC6A3	2.44e-06	LC	Upstream
	rs452384	5	1330840	SLC6A18	8.05e-13	MM	Downstream
	rs452384	5	1330840	TERT	8.05e-13	MM	Downstream
	rs452384	5	1330840	CLPTM1L	8.05e-13	MM	Intron
	rs452384	5	1330840	SLC6A3	8.05e-13	MM	Upstream
	rs467095	5	1336221	SLC6A18	2.96e-06	LC	Downstream
	rs467095	5	1336221	TERT	2.96e-06	LC	Downstream
	rs467095	5	1336221	CLPTM1L	2.96e-06	LC	Intron
	rs467095	5	1336221	SLC6A3	2.96e-06	LC	Upstream
	rs467095	5	1336221	SLC6A18	7.17e-13	MM	Downstream
	rs467095	5	1336221	TERT	7.17e-13	MM	Downstream
	rs467095	5	1336221	CLPTM1L	7.17e-13	MM	Intron
	rs467095	5	1336221	SLC6A3	7.17e-13	MM	Upstream
	rs31489	5	1342714	SLC6A18	1.64e-06	PAAD	Downstream
	rs31489	5	1342714	TERT	1.64e-06	PAAD	Downstream
	rs31489	5	1342714	CLPTM1L	1.64e-06	PAAD	Intron
	rs31489	5	1342714	SLC6A3	1.64e-06	PAAD	Upstream
	rs2596503	6	31320810	MICA	2.96e-07	CESC	Upstream
	rs2523694	6	31417872	MICA	4.68e-09	PRAD	Downstream
	rs2523694	6	31417872	MICB	4.68e-09	PRAD	Upstream
	rs2523694	6	31417872	MCCD1	4.68e-09	PRAD	Upstream
	rs2523694	6	31417872	DDX39B	4.68e-09	PRAD	Upstream
	rs2523694	6	31417872	ATP6V1G2-DDX39B	4.68e-09	PRAD	Upstream
	rs2523694	6	31417872	ATP6V1G2	4.68e-09	PRAD	Upstream
	rs2523694	6	31417872	NFKBIL1	4.68e-09	PRAD	Upstream
	rs2516456	6	31420018	MICA	4.24e-09	PRAD	Downstream
	rs2516456	6	31420018	MICB	4.24e-09	PRAD	Upstream
	rs2516456	6	31420018	MCCD1	4.24e-09	PRAD	Upstream
	rs2516456	6	31420018	DDX39B	4.24e-09	PRAD	Upstream
	rs2516456	6	31420018	ATP6V1G2-DDX39B	4.24e-09	PRAD	Upstream
	rs2516456	6	31420018	ATP6V1G2	4.24e-09	PRAD	Upstream
	rs2516456	6	31420018	NFKBIL1	4.24e-09	PRAD	Upstream
	rs3131618	6	31434621	MICA	3.45e-06	UCEC	Downstream
	rs3131618	6	31434621	MICB	3.45e-06	UCEC	Upstream
	rs3131618	6	31434621	MCCD1	3.45e-06	UCEC	Upstream
	rs3131618	6	31434621	DDX39B	3.45e-06	UCEC	Upstream
	rs3131618	6	31434621	ATP6V1G2-DDX39B	3.45e-06	UCEC	Upstream
	rs3131618	6	31434621	ATP6V1G2	3.45e-06	UCEC	Upstream
	rs3131618	6	31434621	NFKBIL1	3.45e-06	UCEC	Upstream
	rs3134899	6	31473286	MICA	2.3e-11	CESC	Downstream
	rs3134899	6	31473286	MICB	2.3e-11	CESC	Intron
	rs3134899	6	31473286	MCCD1	2.3e-11	CESC	Upstream
	rs3134899	6	31473286	DDX39B	2.3e-11	CESC	Upstream
	rs3134899	6	31473286	ATP6V1G2-DDX39B	2.3e-11	CESC	Upstream
	rs3134899	6	31473286	ATP6V1G2	2.3e-11	CESC	Upstream
	rs3134899	6	31473286	NFKBIL1	2.3e-11	CESC	Upstream
	rs3132468	6	31475486	MICA	6.56e-11	CESC	Downstream
	rs3132468	6	31475486	MICB	6.56e-11	CESC	Intron
	rs3132468	6	31475486	MCCD1	6.56e-11	CESC	Upstream
	rs3132468	6	31475486	DDX39B	6.56e-11	CESC	Upstream
	rs3132468	6	31475486	ATP6V1G2-DDX39B	6.56e-11	CESC	Upstream
	rs3132468	6	31475486	ATP6V1G2	6.56e-11	CESC	Upstream
	rs3132468	6	31475486	NFKBIL1	6.56e-11	CESC	Upstream
	rs2844484	6	31536224	MICB	2.27e-09	CESC	Downstream
	rs2844484	6	31536224	MCCD1	2.27e-09	CESC	Downstream
	rs2844484	6	31536224	DDX39B	2.27e-09	CESC	Downstream
	rs2844484	6	31536224	ATP6V1G2-DDX39B	2.27e-09	CESC	Downstream
	rs2844484	6	31536224	ATP6V1G2	2.27e-09	CESC	Downstream
	rs2844484	6	31536224	NFKBIL1	2.27e-09	CESC	Downstream
	rs2256965	6	31555130	MICB	8.6e-07	CESC	Downstream
	rs2256965	6	31555130	MCCD1	8.6e-07	CESC	Downstream
	rs2256965	6	31555130	DDX39B	8.6e-07	CESC	Downstream
	rs2256965	6	31555130	ATP6V1G2-DDX39B	8.6e-07	CESC	Downstream
	rs2256965	6	31555130	ATP6V1G2	8.6e-07	CESC	Downstream
	rs2256965	6	31555130	NFKBIL1	8.6e-07	CESC	Downstream
	rs3130070	6	31591808	MCCD1	6.69e-11	PRAD	Downstream
	rs3130070	6	31591808	DDX39B	6.69e-11	PRAD	Downstream
	rs3130070	6	31591808	ATP6V1G2-DDX39B	6.69e-11	PRAD	Downstream
	rs3130070	6	31591808	ATP6V1G2	6.69e-11	PRAD	Downstream
	rs3130070	6	31591808	NFKBIL1	6.69e-11	PRAD	Downstream
	rs3130623	6	31597700	MCCD1	9.53e-10	PRAD	Downstream
	rs3130623	6	31597700	DDX39B	9.53e-10	PRAD	Downstream
	rs3130623	6	31597700	ATP6V1G2-DDX39B	9.53e-10	PRAD	Downstream
	rs3130623	6	31597700	ATP6V1G2	9.53e-10	PRAD	Downstream
	rs3130623	6	31597700	NFKBIL1	9.53e-10	PRAD	Downstream
	rs2242660	6	31597753	MCCD1	4.37e-09	PRAD	Downstream
	rs2242660	6	31597753	DDX39B	4.37e-09	PRAD	Downstream
	rs2242660	6	31597753	ATP6V1G2-DDX39B	4.37e-09	PRAD	Downstream
	rs2242660	6	31597753	ATP6V1G2	4.37e-09	PRAD	Downstream
	rs2242660	6	31597753	NFKBIL1	4.37e-09	PRAD	Downstream
	rs3115663	6	31601843	DDX39B	6.01e-11	PRAD	Downstream
	rs3115663	6	31601843	ATP6V1G2-DDX39B	6.01e-11	PRAD	Downstream
	rs3115663	6	31601843	ATP6V1G2	6.01e-11	PRAD	Downstream
	rs3115663	6	31601843	NFKBIL1	6.01e-11	PRAD	Downstream
	rs10885	6	31604591	DDX39B	8.11e-11	PRAD	Downstream
	rs10885	6	31604591	ATP6V1G2-DDX39B	8.11e-11	PRAD	Downstream
	rs10885	6	31604591	ATP6V1G2	8.11e-11	PRAD	Downstream
	rs10885	6	31604591	NFKBIL1	8.11e-11	PRAD	Downstream
	rs672888	8	128345463	POU5F1B	6.79e-15	BRCA	Upstream
	rs418269	8	128346358	POU5F1B	6.69e-15	BRCA	Upstream
	rs10447995	8	128357924	POU5F1B	3.52e-13	BRCA	Upstream
	rs4143118	8	128377468	POU5F1B	2.32e-12	BRCA	Upstream
	rs2392780	8	128388025	POU5F1B	5.65e-11	BRCA	Upstream
	rs6983267	8	128413305	POU5F1B	6.98e-12	COADREAD	Upstream
	rs7014346	8	128424792	POU5F1B	1.55e-09	COADREAD	Upstream
	rs7842552	8	128431694	POU5F1B	3.15e-08	COADREAD	Intron
	rs4871790	8	128441535	POU5F1B	4.79e-07	COADREAD	Downstream
	rs4242384	8	128518554	POU5F1B	5.73e-186	PRAD	Downstream
	rs7814837	8	128522202	POU5F1B	1.26e-185	PRAD	Downstream
	rs10100504	8	128664941	MYC	1.98e-07	PRAD	Upstream
	rs4385433	8	128665480	MYC	6.91e-08	PRAD	Upstream
	rs9642880	8	128718068	MYC	1.77e-09	BLCA	Upstream
	rs10956390	8	128808839	MYC	8.66e-06	PAAD	Downstream
	rs11228565	11	68978580	MYEOV	5.65e-77	PRAD	Upstream
	rs7130881	11	68995958	MYEOV	3.84e-97	PRAD	Upstream
	rs9787877	11	68996509	MYEOV	6.4e-89	PRAD	Upstream
	rs7939250	11	69002950	MYEOV	5.28e-88	PRAD	Upstream
	rs7939454	11	69234390	MYEOV	1.98e-06	KC	Downstream
	rs7105934	11	69239741	MYEOV	2.67e-06	KC	Downstream
	rs10796817	11	69241032	MYEOV	3.34e-06	KC	Downstream
	rs11263429	11	69244027	MYEOV	4.09e-06	KC	Downstream
	rs4576847	11	69250375	MYEOV	6.42e-06	KC	Downstream
	rs10737153	11	69281829	MYEOV	3.77e-08	BRCA	Downstream
	rs3740643	11	69282036	MYEOV	3.93e-08	BRCA	Downstream

## Sheet: Table S3
	Table S3 Pathway enrichment analysis of 15 candidate genes
	Gene Set Name	Description	FDR q-value	Genes enriched
	NIKOLSKY_BREAST_CANCER_5P15_AMPLICON	Genes within amplicon 5p15 identified in a copy number alterations study of 191 breast tumor samples.	7.16e-09	SLC6A3, SLC6A18, SLC6A19, TERT, CLPTM1L
	chr6p21	Ensembl 103 genes in cytogenetic band chr6p21	2.57e-06	MICA, MICB, NFKBIL1, DDX39B, ATP6V1G2, ATP6V1G2-DDX39B, MCCD1
	chr5p15	Ensembl 103 genes in cytogenetic band chr5p15	6.68e-05	SLC6A3, SLC6A18, SLC6A19, TERT, CLPTM1L
	REACTOME_NA_CL_DEPENDENT_NEUROTRANSMITTER_TRANSPORTERS	Na+/Cl- dependent neurotransmitter transporters	0.000325	SLC6A3, SLC6A18, SLC6A19
	GOBP_NEGATIVE_REGULATION_OF_RESPONSE_TO_STIMULUS	Any process that stops, prevents, or reduces the frequency, rate or extent of a response to a stimulus. Response to stimulus is a change in state or activity of a cell or an organism (in terms of movement, secretion, enzyme production, gene expression, etc.) as a result of a stimulus. [GOC:jid]	0.00649	SLC6A3, TERT, MICA, MICB, NFKBIL1, DDX39B, MYC
	HP_PROLINURIA	Prolinuria	0.0135	SLC6A18, SLC6A19
	SAKAI_CHRONIC_HEPATITIS_VS_LIVER_CANCER_UP	Selected genes up-regulated in peripheral blood monocytes (PBMC) of patients with hepatocellular carcinoma (HCC) compared to those with chronic hepatitis.	0.0135	MICA, MICB, MYC
	GOMF_ACTIVE_TRANSMEMBRANE_TRANSPORTER_ACTIVITY	Enables the transfer of a specific substance or related group of substances from one side of a membrane to the other, up the solute's concentration gradient. The transporter binds the solute and undergoes a series of conformational changes. Transport works equally well in either direction. [GOC:mtg_transport, ISBN:0815340729]	0.0135	SLC6A3, SLC6A18, SLC6A19, ATP6V1G2
	REACTOME_TRANSPORT_OF_BILE_SALTS_AND_ORGANIC_ACIDS_METAL_IONS_AND_AMINE_COMPOUNDS	Transport of bile salts and organic acids, metal ions and amine compounds	0.0135	SLC6A3, SLC6A18, SLC6A19
	GOMF_NATURAL_KILLER_CELL_LECTIN_LIKE_RECEPTOR_BINDING	Interacting selectively and non-covalently with a lectin-like natural killer cell receptor. [GOC:ai]	0.0135	MICA, MICB

## Sheet: Table S4
	Table S4 Summary of the multivariable Cox regression of 12 CAPER genes in random gene set
	Gene	Coef.	SE (coef.)	z	P	HR (95%CI)
	AGPS	0.19	0.05	3.74	0.000184	1.21 (1.10, 1.34)
	CDK5	-0.01	0.05	-0.18	0.86	0.99 (0.89, 1.10)
	FBXO39	0.01	0.12	0.04	0.96	1.01 (0.79, 1.28)
	FTH1P16	0.06	0.05	1.34	0.18	1.06 (0.97, 1.16)
	GLRX5	-0.01	0.06	-0.25	0.8	0.99 (0.88, 1.10)
	KCNJ14	0.21	0.08	2.61	0.009	1.24 (1.06, 1.46)
	NAA16	-0.06	0.07	-0.79	0.43	0.94 (0.82, 1.09)
	PDGFRL	0	0.02	0.01	0.99	1.00 (0.96, 1.05)
	RAD21	-0.05	0.04	-1.09	0.28	0.95 (0.88, 1.04)
	SMARCAL1	-0.01	0.09	-0.12	0.9	0.99 (0.82, 1.19)
	TMEM266	0.14	0.06	2.18	0.03	1.15 (1.01, 1.31)
	WDFY1	-0.03	0.05	-0.69	0.49	0.97 (0.87, 1.07)

## Sheet: Table S5
	Table S5 The results of Spearman correlation between CAPER score and drug sensitivity
	Drug Name	P	R	Target	Pathway
	Afatinib	6.71e-17	-0.281992	ERBB2, EGFR	EGFR signaling
	Trametinib	2.12e-12	-0.231905	MEK1, MEK2	ERK MAPK signaling
	Selumetinib	1.36e-11	-0.220388	MEK1, MEK2	ERK MAPK signaling
	Refametinib	2.22e-10	-0.211942	MEK1, MEK2	ERK MAPK signaling
	Gefitinib	7.2e-08	-0.183986	EGFR	EGFR signaling
	CI-1040	2e-07	-0.178317	MEK1, MEK2	ERK MAPK signaling
	VX-11e	6.01e-07	-0.163571	ERK2	ERK MAPK signaling
	Pelitinib	2.12e-06	-0.155412	EGFR	EGFR signaling
	PD0325901	3.42e-06	-0.159358	MEK1, MEK2	ERK MAPK signaling
	Pictilisib	5.71e-06	-0.151422	PI3K (class 1)	PI3K/MTOR signaling
	Dabrafenib	6.3e-06	-0.152089	BRAF	ERK MAPK signaling
	rTRAIL	9.21e-06	-0.145473	TRAIL receptor agonist	Apoptosis regulation
	Bosutinib	1.77e-05	-0.146532	SRC, ABL, TEC	Other, kinases
	Axitinib	2.56e-05	0.144247	PDGFR, KIT, VEGFR	RTK signaling
	Epothilone B	5.09e-05	-0.136747	Microtubule stabiliser	Mitosis
	SB52334	5.61e-05	0.132411	ALK5	Other, kinases
	BMS-536924	6.06e-05	-0.131221	IGF1R, IR	IGF1R signaling
	Tanespimycin	0.000159477	-0.129108	HSP90	Protein stability and degradation
	Palbociclib	0.000324185	-0.124806	CDK4, CDK6	Cell cycle
	WHI-P97	0.000370017	-0.117081	JAK3	Other, kinases
	GSK269962A	0.000417507	0.115427	ROCK1, ROCK2	Cytoskeleton
	Thapsigargin	0.000504604	-0.118501	SERCA	Other
	HG-5-113-01	0.000546686	-0.15468	LOK, LTK, TRCB, ABL(T315I)	Other
	Lapatinib	0.00116163	-0.162447	EGFR, ERBB2	RTK signaling
	AS605240	0.00121312	-0.106579	PI3Kgamma	PI3K/MTOR signaling
	GSK429286A	0.00137957	0.105087	ROCK1, ROCK2	Cytoskeleton
	AICA Ribonucleotide	0.00139764	-0.109998	AMPK agonist	Metabolism
	OSU-03012	0.00182242	-0.105497	PDK1 (PDPK1)	Metabolism
	Enzastaurin	0.00219315	-0.100746	PKCB	Other, kinases
	Sunitinib	0.00254031	-0.150723	PDGFR, KIT, VEGFR, FLT3, RET, CSF1R	RTK signaling
	WZ-1-84	0.00255556	-0.150633	BMX	Other, kinases
	Vinorelbine	0.00277072	-0.100636	Microtubule destabiliser	Mitosis
	Quizartinib	0.00305612	0.0974494	FLT3	RTK signaling
	Luminespib	0.00345542	-0.0994897	HSP90	Protein stability and degradation
	Paclitaxel	0.00350253	-0.145667	Microtubule stabiliser	Mitosis
	Tipifarnib	0.00379534	-0.0980436	Farnesyl-transferase (FNTA)	Other
	BMS-509744	0.00440022	-0.142119	ITK	Other, kinases
	Erlotinib	0.0049901	-0.145597	EGFR	EGFR signaling
	TW 37	0.00535936	0.091616	BCL2, BCL-XL, MCL1	Apoptosis regulation
	Gemcitabine	0.0053623	-0.0944887	Pyrimidine antimetabolite	DNA replication
	AKT inhibitor VIII	0.00558471	-0.0934525	AKT1, AKT2, AKT3	PI3K/MTOR signaling
	BI-2536	0.00571161	-0.13831	PLK1, PLK2, PLK3	Cell cycle
	ZSTK474	0.00578801	-0.0907673	PI3K (class 1)	PI3K/MTOR signaling
	FH535	0.0059041	-0.0933216	PPARgamma, PPARdelta	Other
	Cetuximab	0.00739864	-0.0903081	EGFR	EGFR signaling
	JW-7-52-1	0.00785677	-0.135289	MTOR	PI3K/MTOR signaling
	Obatoclax Mesylate	0.00810696	-0.089968	BCL2, BCL-XL, BCL-W, MCL1	Apoptosis regulation
	FR-180204	0.00967029	-0.0852184	ERK1, ERK2	ERK MAPK signaling
	THZ-2-49	0.0109255	-0.0839659	CDK9	Cell cycle
	GW-2580	0.0111737	0.0834809	CSF1R	RTK signaling
	AT-7519	0.0113942	-0.0833919	CDK1, CDK2, CDK4, CDK6, CDK9	Cell cycle
	GW843682X	0.0118298	-0.125753	PLK1	Cell cycle
	JNK-9L	0.0124876	-0.0841319	JNK2, JNK3	JNK and p38 signaling
	Pazopanib	0.0124996	0.0846988	CSF1R, KIT, PDGFRA, PDGFRB	RTK signaling
	Linsitinib	0.0128349	-0.0844298	IGF1R	IGF1R signaling
	AS601245	0.0130181	-0.0842108	JNK1, JNK2, JNK2	JNK and p38 signaling
	BMS-754807	0.0132663	-0.0840316	IGF1R, IR	RTK signaling
	AZD8055	0.0138497	-0.0847578	MTORC1, MTORC2	PI3K/MTOR signaling
	AZ628	0.0146932	-0.121465	BRAF	ERK MAPK signaling
	Tivozanib	0.0166965	0.0788469	VEGFR1, VEGFR2, VEGFR3	RTK signaling
	KIN001-270	0.017725	0.0781241	CDK9	Cell cycle
	SL0101	0.018201	-0.0816264	RSK, AURKB, PIM1, PIM3	Other, kinases
	5-Fluorouracil	0.018791	-0.0776659	Antimetabolite (DNA & RNA)	Other
	XAV939	0.0196339	-0.0768034	TNKS1, TNKS2	WNT signaling
	HG-5-88-01	0.0209027	-0.103722	EGFR, ADCK4	Other, kinases
	MPS-1-IN-1	0.0220837	-0.0754997	MPS1	Mitosis
	Dasatinib	0.0233866	-0.113913	ABL, SRC, Ephrins, PDGFR, KIT	RTK signaling
	Omipalisib	0.024519	-0.0740221	PI3K (class 1), MTORC1, MTORC2	PI3K/MTOR signaling
	KU-55933	0.0255495	-0.076602	ATM	Genome integrity
	Docetaxel	0.0264831	-0.0760354	Microtubule stabiliser	Mitosis
	TAK-715	0.0273339	-0.0725588	p38alpha, p38beta	JNK and p38 signaling
	NSC-207895	0.0325419	0.0706395	MDM4	p53 pathway
	BX-912	0.0340352	0.0698166	PDK1 (PDPK1)	Metabolism
	TL-2-105	0.0342728	0.0696112	not defined	Other
	Mitomycin-C	0.0395956	-0.069666	DNA crosslinker	DNA replication
	PF-562271	0.040029	-0.0698351	FAK, FAK2	Cytoskeleton
	PHA-793887	0.0408407	-0.0673316	CDK2, CDK7, CDK5	Cell cycle
	Genentech Cpd 10	0.041431	0.0670996	AURKA, AURKB	Mitosis
	Dacinostat	0.041812	-0.0689042	HDAC1	Chromatin histone acetylation
	Avagacestat	0.0461629	-0.0654752	Amyloid beta20, Amyloid beta40	Other
	CGP-60474	0.047336	-0.0993542	CDK1,CDK2,CDK5,CDK7,CDK9, PKC	Cell cycle
	GSK650394	0.0505057	-0.0665939	SGK2, SGK3	Other, kinases
	QL-XI-92	0.0511308	0.0642183	DDR1	Cytoskeleton
	PLX-4720	0.0516563	-0.0667743	BRAF	ERK MAPK signaling
	Sepantronium bromide	0.0527197	-0.0649947	BIRC5	Apoptosis regulation
	Ruxolitinib	0.0538903	0.0634736	JAK1, JAK2	Other, kinases
	TL-1-85	0.0552628	0.0631836	TAK	Other, kinases
	Linifanib	0.057714	0.0624926	VEGFR1, VEGFR2, VEGFR3, CSF1R, FLT3, KIT	RTK signaling
	NVP-TAE684	0.0616545	-0.0928315	ALK	RTK signaling
	Zibotentan	0.0642622	0.0609974	Endothelin-1 receptor (EDNRA)	Other
	VX-702	0.0694669	-0.062336	p38	JNK and p38 signaling
	I-BET-762	0.0702935	0.0597349	BRD2, BRD3, BRD4	Chromatin other
	UNC0638	0.0704927	0.0597903	G9a and GLP methyltransferases	Chromatin histone methylation
	Wee1 Inhibitor	0.0713671	-0.0654024	WEE1, CHEK1	Cell cycle
	Navitoclax	0.0749525	0.0610771	BCL2, BCL-XL, BCL-W	Apoptosis regulation
	Bexarotene	0.0769262	-0.0603486	Retinioic X receptor (RXR) agonist	Other
	Bleomycin	0.0801274	-0.0595678	dsDNA break induction	DNA replication
	CHIR-99021	0.0852175	0.0580877	GSK3A, GSK3B	WNT signaling
	SB590885	0.0853144	-0.0597252	BRAF	ERK MAPK signaling
	CGP-082996	0.086305	-0.0859791	CDK4	Cell cycle
	A-443654	0.0973863	-0.0831039	AKT1, AKT2, AKT3	PI3K/MTOR signaling
	Entinostat	0.0999291	0.0822747	HDAC1, HDAC3	Chromatin histone acetylation
	Methotrexate	0.109873	-0.0548426	Antimetabolite	DNA replication
	Dactolisib	0.110436	-0.0549829	PI3K (class 1), MTORC1, MTORC2	PI3K/MTOR signaling
	BX795	0.11173	0.0545583	TBK1, PDK1 (PDPK1), IKK, AURKB, AURKC	Other, kinases
	Rapamycin	0.124328	-0.080811	MTORC1	PI3K/MTOR signaling
	Y-39983	0.128014	0.0501875	ROCK	Cytoskeleton
	PD173074	0.129283	0.0520386	FGFR1, FGFR2, FGFR3	RTK signaling
	QL-VIII-58	0.12973	-0.0679145	MTOR, ATR	Other
	EHT-1864	0.13026	0.0497569	RAC1, RAC2, RAC3	Cytoskeleton
	Phenformin	0.13453	-0.0495635	Biguanide agent	Other
	LFM-A13	0.137953	-0.0503055	BTK	Other, kinases
	NG-25	0.140398	0.0486175	TAK1, MAP4K2	Other, kinases
	JQ12	0.149229	-0.048798	HDAC1, HDAC2	Chromatin histone acetylation
	FTI-277	0.150448	-0.0484861	Farnesyl-transferase (FNTA)	Other
	QL-XII-61	0.150897	0.0659995	BMX, BTK	Other, kinases
	Tubastatin A	0.153255	0.0471733	HDAC1, HDAC6, HDAC8	Chromatin histone acetylation
	Masitinib	0.163754	0.0458995	KIT, PDGFRA, PDGFRB	RTK signaling
	GSK319347A	0.164312	0.0694084	IKK	Other, kinases
	XMD8-85	0.170909	-0.0687713	ERK5, BET	Other
	Veliparib	0.172537	-0.0467725	PARP1, PARP2	Genome integrity
	Doxorubicin	0.177715	-0.0456848	Anthracycline	DNA replication
	TGX221	0.182294	-0.0667372	PI3Kbeta	PI3K/MTOR signaling
	Cisplatin	0.189006	0.0450399	DNA crosslinker	DNA replication
	Ispinesib Mesylate	0.192947	-0.0428913	KSP	Mitosis
	NVP-BHG712	0.198098	-0.0424462	EPHB4	RTK signaling
	KIN001-260	0.198282	0.042452	IKKB	Other, kinases
	Vismodegib	0.202213	-0.0437292	SMO	Other
	A-770041	0.205994	-0.0633676	LCK, FYN	Other, kinases
	Selisistat	0.218721	0.0406325	SIRT1	Chromatin histone acetylation
	Z-LLNle-CHO	0.22158	-0.0613283	gamma-secretase	Other
	Lenalidomide	0.221589	-0.0419145	CRBN	Protein stability and degradation
	DMOG	0.230101	-0.0405425	HIF-PH	Metabolism
	TPCA-1	0.236366	-0.0390562	IKK2	Other, kinases
	GW441756	0.247308	0.0397434	NTRK1	RTK signaling
	SNX-2112	0.25852	-0.0374323	HSP90	Protein stability and degradation
	Embelin	0.260348	-0.0381355	XIAP	Apoptosis regulation
	XMD11-85h	0.262076	-0.0503905	BRSK2, FLT4, MARK4, PRKCD, RET, SRPK1	Other, kinases
	Amuvatinib	0.264121	0.0369146	KIT, PDGFRA, FLT3	RTK signaling
	GSK1070916	0.267192	0.0371066	AURKA, AURKC	Mitosis
	S-Trityl-L-cysteine	0.26896	-0.0555436	KIF11	Mitosis
	QS11	0.27888	-0.0367098	ARFGAP1	Other
	Pyrimethamine	0.285651	-0.0533808	Dihydrofolate reductase (DHFR)	Other
	SB505124	0.301383	0.033884	TGFBR1, ACVR1B, ACVR1C	RTK signaling
	BMS-345541	0.305288	-0.0337614	IKK1, IKK2	Other, kinases
	WZ3105	0.314786	-0.0331234	SRC, ROCK2, NTRK2, FLT3, IRAK1, others	Other
	NPK76-II-72-1	0.315769	0.0330922	PLK3	Cell cycle
	CP724714	0.326793	-0.032312	ERBB2	RTK signaling
	Parthenolide	0.330048	0.0486416	HDAC1	Chromatin histone acetylation
	CAY10603	0.330847	0.0321649	HDAC1, HDAC6	Chromatin histone acetylation
	PFI-1	0.336552	-0.0314582	BRD4	Chromatin other
	Saracatinib	0.349222	-0.0465187	ABL, SRC	Other, kinases
	BAY-61-3606	0.350509	-0.031708	SYK	Other, kinases
	WH-4-023	0.35575	-0.0464703	SRC, LCK	Other, kinases
	Camptothecin	0.35638	0.0316494	TOP1	DNA replication
	GNF-2	0.361449	-0.0459231	BCR-ABL	ABL signaling
	Vinblastine	0.373697	-0.0305091	Microtubule destabiliser	Mitosis
	Tozasertib	0.37871	-0.044467	AURKA, AURKB, AURKC, others	Mitosis
	KIN001-244	0.378882	0.0290447	PDK1 (PDPK1)	Metabolism
	YM201636	0.384883	0.0286654	PIKFYVE	PI3K/MTOR signaling
	Salubrinal	0.385155	-0.0435923	EIF2A	Other
	Idelalisib	0.394236	-0.0280599	PI3Kdelta	PI3K/MTOR signaling
	HG6-64-1	0.401164	-0.0283842	BRAF	ERK MAPK signaling
	QL-X-138	0.404402	0.0276725	BTK	Other, kinases
	Piperlongumine	0.409113	0.0270661	Induces reactive oxygen species	Other
	Elesclomol	0.415401	0.0279492	HSP90	Protein stability and degradation
	QL-XII-47	0.426184	0.0262516	BTK, BMX	Other, kinases
	Cyclopamine	0.439914	-0.0388705	SMO	Other
	Alectinib	0.453686	-0.024733	ALK	RTK signaling
	MK-2206	0.465012	-0.0254359	AKT1, AKT2	PI3K/MTOR signaling
	OSI-930	0.469325	-0.0238588	KIT	RTK signaling
	XMD14-99	0.476451	0.0234651	ALK, CDK7, LTK, others	Other, kinases
	GSK690693	0.476688	0.023478	AKT1, AKT2, AKT3	PI3K/MTOR signaling
	VNLG/124	0.478399	0.0234252	HDAC,RAR	Chromatin histone acetylation
	Rucaparib	0.481087	0.0232027	PARP1, PARP2	Genome integrity
	Crizotinib	0.503667	-0.033282	MET, ALK, ROS1	RTK signaling
	PF-4708671	0.507015	0.0220184	S6K1	PI3K/MTOR signaling
	Motesanib	0.515191	0.0223343	VEGFR, RET, KIT, PDGFR	RTK signaling
	SB216763	0.521148	-0.0234268	GSK3A, GSK3B	WNT signaling
	JNK Inhibitor VIII	0.526963	-0.0217379	JNK	JNK and p38 signaling
	CCT-018159	0.533278	-0.0207784	HSP90	Protein stability and degradation
	Doramapimod	0.535521	-0.0213909	p38, JNK2	JNK and p38 signaling
	Bortezomib	0.536165	-0.0309819	Proteasome	Protein stability and degradation
	PI-103	0.541352	0.0202281	PI3Kalpha, DAPK3, CLK4, PIM3, HIPK2	Other, kinases
	IOX2	0.543381	0.0199168	EGLN1	Other
	Foretinib	0.551881	0.019661	MET, KDR, TIE2, VEGFR3/FLT4, RON, PDGFR, FGFR1, EGFR	RTK signaling
	Cytarabine	0.552784	-0.0204082	Antimetabolite	Other
	Tamoxifen	0.576985	-0.018291	ESR1	Hormone-related
	CCT007093	0.581918	0.0181328	PPM1D	Cell cycle
	FMK	0.583806	-0.0195077	RSK	Other, kinases
	RO-3306	0.588868	-0.0185495	CDK1	Cell cycle
	NU7441	0.589593	-0.0185462	DNAPK	Genome integrity
	XMD13-2	0.596388	0.0174639	RIPK1	Apoptosis regulation
	Olaparib	0.598743	-0.0174632	PARP1, PARP2	Genome integrity
	Shikonin	0.599335	-0.0177538	not defined	Other
	JW-7-24-1	0.613216	0.0166598	LCK	Other, kinases
	AZD6482	0.615669	-0.0167244	PI3Kbeta	PI3K/MTOR signaling
	Ponatinib	0.633628	0.0160798	ABL, PDGFRA, VEGFR2, FGFR1, SRC, TIE2, FLT3	Other, kinases
	Etoposide	0.634985	-0.0160064	TOP2	DNA replication
	Midostaurin	0.653647	-0.0151291	PKC, PPK, FLT1, c-FGR, others	Other
	Nilotinib	0.655585	-0.0157304	ABL	ABL signaling
	Fedratinib	0.658327	0.014575	JAK2	Other, kinases
	PHA-665752	0.658349	-0.0219837	MET	RTK signaling
	Pevonedistat	0.663676	-0.0163896	NAE	Other
	Belinostat	0.666735	0.0144058	HDAC1	Chromatin histone acetylation
	OSI-027	0.670511	-0.014068	MTORC1, MTORC2	PI3K/MTOR signaling
	Seliciclib	0.686685	-0.0203059	CDK2, CDK7, CDK9	Cell cycle
	Temsirolimus	0.691164	0.0137325	MTOR	PI3K/MTOR signaling
	AR-42	0.697179	0.0129026	HDAC1	Chromatin histone acetylation
	KIN001-236	0.700685	-0.012683	Angiopoietin-1 receptor	RTK signaling
	Daporinad	0.715421	0.0121332	NAMPT	Metabolism
	Cabozantinib	0.720189	-0.0118189	VEGFR, MET, RET, KIT, FLT1, FLT3, FLT4, TIE2,AXL	RTK signaling
	STF-62247	0.72819	0.0114794	Autophagy inducer	Other
	CUDC-101	0.734708	0.0112859	HDAC1-10, EGFR, ERBB2	Other
	JQ1	0.753409	-0.0105987	BRD2, BRD3, BRD4, BRDT	Chromatin other
	KIN001-266	0.759546	-0.010099	MAP3K8	ERK MAPK signaling
	MG-132	0.766162	0.0148971	Proteasome, CAPN1	Protein stability and degradation
	CP466722	0.772297	-0.00953232	ATM	Genome integrity
	NSC-87877	0.773698	-0.0097232	SHP-1 (PTPN6), SHP-2 (PTPN11)	Other
	CMK	0.781238	-0.0139458	RSK2	Other, kinases
	XMD15-27	0.785696	0.00896177	CAMK2	Other, kinases
	SN-38	0.799481	-0.00831674	TOP1	DNA replication
	YK-4-279	0.811486	-0.00845972	RNA helicase A	Other
	IPA-3	0.815621	0.00791229	PAK1	Cytoskeleton
	CX-5461	0.816461	-0.00766655	RNA Polymerase 1	Other
	XMD8-92	0.825558	-0.00989762	MAPK7	ERK MAPK signaling
	Bicalutamide	0.834064	0.00710851	AR	Hormone-related
	Bleomycin (50 uM)	0.85044	-0.00615702	dsDNA break induction	DNA replication
	PAC-1	0.856131	0.00619126	Procaspase-3, Procaspase-7	Apoptosis regulation
	Serdemetan	0.857631	0.00591798	MDM2	p53 pathway
	AZD7762	0.859737	0.00606511	CHEK1, CHEK2	Cell cycle
	Vorinostat	0.862877	0.00592098	HDAC inhibitor Class I, IIa, IIb, IV	Chromatin histone acetylation
	(5Z)-7-Oxozeaenol	0.904506	-0.00395993	TAK1	Other, kinases
	Bryostatin 1	0.908191	0.00391985	PKC	Other
	UNC1215	0.909675	0.00375489	L3MBTL3	Chromatin other
	ZM447439	0.923463	-0.00339696	AURKA, AURKB	Mitosis
	THZ-2-102-1	0.926942	-0.00305497	CDK7	Cell cycle
	SGC0946	0.938377	-0.00256018	DOT1L	Chromatin histone methylation
	T0901317	0.942807	0.00237495	LXR, FXR	Other
	BIX02189	0.943712	0.00232969	MEK5, ERK5	ERK MAPK signaling
	Imatinib	0.950485	-0.00308754	ABL, KIT, PDGFR	Other, kinases
	PIK-93	0.952569	-0.00196264	PI3Kgamma	PI3K/MTOR signaling
	Lestaurtinib	0.954644	0.00195217	FLT3, JAK2, NTRK1, NTRK2, NTRK3	Other, kinases
	ZG-10	0.961125	0.00219115	JNK1	JNK and p38 signaling
	Talazoparib	0.973228	-0.00110836	PARP1, PARP2	Genome integrity
	Temozolomide	0.976573	-0.000972469	DNA alkylating agent	DNA replication
	Nutlin-3a (-)	0.97658	0.00100764	MDM2	p53 pathway
	Sorafenib	0.986915	0.000818486	PDGFR, KIT, VEGFR, RAF	RTK signaling
	GSK1904529A	0.991785	0.000349166	IGF1R, IR	RTK signaling
	Tretinoin	0.994015	-0.000258827	Retinoic acid	Other

## Sheet: Table S6
	Table S6 eQTL pairs defined in the GTEx database
	Gene	SNP	Effect Size	P	Tissue
	ATP6V1G2	rs2242660	-0.19	6.9e-07	Esophagus - Muscularis
	ATP6V1G2	rs2256965	-0.24	8.3e-13	Cells - Cultured fibroblasts
	ATP6V1G2	rs2256965	-0.21	3.9e-10	Thyroid
	ATP6V1G2	rs2256965	-0.28	3.4e-09	Adipose - Visceral (Omentum)
	ATP6V1G2	rs2256965	-0.23	1.7e-08	Artery - Tibial
	ATP6V1G2	rs2256965	-0.32	1.8e-07	Pituitary
	ATP6V1G2	rs2256965	-0.19	2.5e-07	Esophagus - Muscularis
	ATP6V1G2	rs2256965	-0.21	8e-07	Adipose - Subcutaneous
	ATP6V1G2	rs2256965	-0.21	7.1e-06	Skin - Sun Exposed (Lower leg)
	ATP6V1G2	rs2256965	-0.22	1.3e-05	Testis
	ATP6V1G2	rs2256965	-0.15	0.0001	Lung
	ATP6V1G2	rs2256965	-0.16	0.00014	Nerve - Tibial
	ATP6V1G2	rs2596503	0.34	6.2e-05	Pituitary
	ATP6V1G2	rs2596503	0.19	7.5e-05	Whole Blood
	ATP6V1G2	rs2596503	0.23	0.00018	Artery - Aorta
	ATP6V1G2	rs2844484	-0.33	1.1e-14	Artery - Tibial
	ATP6V1G2	rs2844484	-0.27	1.2e-14	Cells - Cultured fibroblasts
	ATP6V1G2	rs2844484	-0.26	6.7e-13	Thyroid
	ATP6V1G2	rs2844484	-0.32	1.2e-10	Adipose - Visceral (Omentum)
	ATP6V1G2	rs2844484	-0.24	4.6e-08	Adipose - Subcutaneous
	ATP6V1G2	rs2844484	-0.34	1.7e-07	Pituitary
	ATP6V1G2	rs2844484	-0.2	3.6e-07	Esophagus - Muscularis
	ATP6V1G2	rs2844484	-0.2	1.1e-06	Nerve - Tibial
	ATP6V1G2	rs2844484	-0.23	4.8e-06	Skin - Sun Exposed (Lower leg)
	ATP6V1G2	rs2844484	-0.24	5e-06	Testis
	ATP6V1G2	rs2844484	-0.22	9.8e-06	Artery - Aorta
	ATP6V1G2	rs2844484	-0.14	3.3e-05	Colon - Sigmoid
	ATP6V1G2	rs2844484	-0.22	4e-05	Breast - Mammary Tissue
	ATP6V1G2	rs2844484	-0.21	8.9e-05	Esophagus - Gastroesophageal Junction
	ATP6V1G2	rs3132468	0.21	4.9e-06	Whole Blood
	ATP6V1G2	rs3132468	0.21	1.7e-05	Nerve - Tibial
	ATP6V1G2	rs3132468	0.17	0.00022	Artery - Tibial
	ATP6V1G2	rs3134899	0.23	1.3e-06	Whole Blood
	ATP6V1G2	rs3134899	0.34	2e-05	Spleen
	ATP6V1G2	rs3134899	0.2	7.4e-05	Nerve - Tibial
	CLPTM1L	rs10073340	-0.13	5.5e-06	Skin - Not Sun Exposed (Suprapubic)
	CLPTM1L	rs31489	-0.11	2.3e-08	Skin - Not Sun Exposed (Suprapubic)
	CLPTM1L	rs31489	0.11	8.8e-07	Stomach
	CLPTM1L	rs31489	-0.097	2.2e-06	Skin - Sun Exposed (Lower leg)
	CLPTM1L	rs31489	-0.12	2.7e-06	Esophagus - Mucosa
	CLPTM1L	rs31489	0.075	2.8e-05	Artery - Tibial
	CLPTM1L	rs380286	-0.14	1.1e-12	Skin - Not Sun Exposed (Suprapubic)
	CLPTM1L	rs380286	-0.11	1.3e-08	Skin - Sun Exposed (Lower leg)
	CLPTM1L	rs380286	-0.13	2.5e-07	Esophagus - Mucosa
	CLPTM1L	rs380286	0.096	3.5e-06	Stomach
	CLPTM1L	rs401681	-0.14	3.6e-12	Skin - Not Sun Exposed (Suprapubic)
	CLPTM1L	rs401681	-0.12	3.3e-09	Skin - Sun Exposed (Lower leg)
	CLPTM1L	rs401681	-0.14	3.9e-08	Esophagus - Mucosa
	CLPTM1L	rs401681	0.097	3.1e-06	Stomach
	CLPTM1L	rs421284	-0.14	1.4e-12	Skin - Not Sun Exposed (Suprapubic)
	CLPTM1L	rs421284	-0.11	1.1e-08	Skin - Sun Exposed (Lower leg)
	CLPTM1L	rs421284	-0.13	5.1e-08	Esophagus - Mucosa
	CLPTM1L	rs421284	0.095	4.4e-06	Stomach
	CLPTM1L	rs421629	-0.13	2.4e-11	Skin - Not Sun Exposed (Suprapubic)
	CLPTM1L	rs421629	-0.11	2.4e-08	Skin - Sun Exposed (Lower leg)
	CLPTM1L	rs421629	-0.12	1.6e-06	Esophagus - Mucosa
	CLPTM1L	rs421629	0.096	4.3e-06	Stomach
	CLPTM1L	rs452384	-0.14	4.4e-12	Skin - Not Sun Exposed (Suprapubic)
	CLPTM1L	rs452384	-0.11	1.5e-08	Skin - Sun Exposed (Lower leg)
	CLPTM1L	rs452384	-0.13	4.3e-08	Esophagus - Mucosa
	CLPTM1L	rs452384	0.096	3.9e-06	Stomach
	CLPTM1L	rs452932	-0.14	2.2e-12	Skin - Not Sun Exposed (Suprapubic)
	CLPTM1L	rs452932	-0.11	1.5e-08	Skin - Sun Exposed (Lower leg)
	CLPTM1L	rs452932	-0.13	5.1e-08	Esophagus - Mucosa
	CLPTM1L	rs452932	0.095	4.4e-06	Stomach
	CLPTM1L	rs465498	-0.13	5.9e-12	Skin - Not Sun Exposed (Suprapubic)
	CLPTM1L	rs465498	-0.11	1.4e-08	Skin - Sun Exposed (Lower leg)
	CLPTM1L	rs465498	-0.13	9.7e-08	Esophagus - Mucosa
	CLPTM1L	rs465498	0.093	6.2e-06	Stomach
	CLPTM1L	rs467095	-0.13	4.4e-11	Skin - Not Sun Exposed (Suprapubic)
	CLPTM1L	rs467095	-0.11	3.7e-08	Skin - Sun Exposed (Lower leg)
	CLPTM1L	rs467095	-0.13	2.2e-07	Esophagus - Mucosa
	CLPTM1L	rs467095	0.096	5.5e-06	Stomach
	CLPTM1L	rs4975615	0.11	7.5e-08	Skin - Not Sun Exposed (Suprapubic)
	CLPTM1L	rs4975615	-0.11	2.4e-07	Stomach
	CLPTM1L	rs4975615	0.12	4.5e-06	Esophagus - Mucosa
	CLPTM1L	rs4975615	-0.074	4.9e-05	Artery - Tibial
	CLPTM1L	rs4975615	0.083	6.1e-05	Skin - Sun Exposed (Lower leg)
	CLPTM1L	rs4975616	0.12	6.3e-10	Skin - Not Sun Exposed (Suprapubic)
	CLPTM1L	rs4975616	0.1	7.4e-07	Skin - Sun Exposed (Lower leg)
	CLPTM1L	rs4975616	0.12	3e-06	Esophagus - Mucosa
	CLPTM1L	rs4975616	-0.096	5.3e-06	Stomach
	CLPTM1L	rs6554759	0.13	4.7e-06	Skin - Not Sun Exposed (Suprapubic)
	DDX39B	rs2256965	-0.13	3.6e-07	Whole Blood
	DDX39B	rs2844484	-0.13	2.1e-06	Whole Blood
	DDX39B	rs2844484	-0.11	1.6e-05	Skin - Sun Exposed (Lower leg)
	MICA	rs10885	0.31	4e-05	Cells - Cultured fibroblasts
	MICA	rs2516456	-0.21	4.4e-09	Skin - Sun Exposed (Lower leg)
	MICA	rs2516456	-0.24	5e-07	Heart - Left Ventricle
	MICA	rs2516456	-0.22	8.2e-07	Breast - Mammary Tissue
	MICA	rs2516456	-0.16	1e-06	Skin - Not Sun Exposed (Suprapubic)
	MICA	rs2516456	0.53	1.3e-06	Brain - Cerebellar Hemisphere
	MICA	rs2516456	-0.19	2.6e-06	Artery - Tibial
	MICA	rs2516456	-0.25	4.1e-06	Testis
	MICA	rs2516456	-0.25	5.2e-06	Cells - Cultured fibroblasts
	MICA	rs2516456	-0.15	1.6e-05	Adipose - Visceral (Omentum)
	MICA	rs2516456	-0.15	1.8e-05	Lung
	MICA	rs2516456	-0.16	2.3e-05	Adipose - Subcutaneous
	MICA	rs2516456	-0.15	2.4e-05	Esophagus - Mucosa
	MICA	rs2516456	-0.19	2.7e-05	Colon - Sigmoid
	MICA	rs2516456	-0.25	3.6e-05	Adrenal Gland
	MICA	rs2516456	-0.18	4.1e-05	Esophagus - Gastroesophageal Junction
	MICA	rs2516456	-0.16	4.3e-05	Muscle - Skeletal
	MICA	rs2516456	-0.16	6.6e-05	Thyroid
	MICA	rs2516456	-0.2	9.6e-05	Colon - Transverse
	MICA	rs2516456	-0.17	0.00011	Nerve - Tibial
	MICA	rs2516456	-0.24	0.00015	Pancreas
	MICA	rs2516456	-0.15	0.00021	Esophagus - Muscularis
	MICA	rs2523694	-0.21	4.4e-09	Skin - Sun Exposed (Lower leg)
	MICA	rs2523694	-0.24	5e-07	Heart - Left Ventricle
	MICA	rs2523694	-0.22	8.2e-07	Breast - Mammary Tissue
	MICA	rs2523694	-0.16	1e-06	Skin - Not Sun Exposed (Suprapubic)
	MICA	rs2523694	0.53	1.3e-06	Brain - Cerebellar Hemisphere
	MICA	rs2523694	-0.19	2.6e-06	Artery - Tibial
	MICA	rs2523694	-0.25	4.1e-06	Testis
	MICA	rs2523694	-0.25	5.2e-06	Cells - Cultured fibroblasts
	MICA	rs2523694	-0.15	1.6e-05	Adipose - Visceral (Omentum)
	MICA	rs2523694	-0.15	1.8e-05	Lung
	MICA	rs2523694	-0.16	2.3e-05	Adipose - Subcutaneous
	MICA	rs2523694	-0.15	2.4e-05	Esophagus - Mucosa
	MICA	rs2523694	-0.19	2.7e-05	Colon - Sigmoid
	MICA	rs2523694	-0.25	3.6e-05	Adrenal Gland
	MICA	rs2523694	-0.18	4.1e-05	Esophagus - Gastroesophageal Junction
	MICA	rs2523694	-0.16	4.3e-05	Muscle - Skeletal
	MICA	rs2523694	-0.16	6.6e-05	Thyroid
	MICA	rs2523694	-0.2	9.6e-05	Colon - Transverse
	MICA	rs2523694	-0.17	0.00011	Nerve - Tibial
	MICA	rs2523694	-0.24	0.00015	Pancreas
	MICA	rs2523694	-0.15	0.00021	Esophagus - Muscularis
	MICA	rs2596503	-0.34	8e-12	Muscle - Skeletal
	MICA	rs2596503	-0.27	3.8e-08	Thyroid
	MICA	rs2596503	-0.35	2.3e-07	Cells - Cultured fibroblasts
	MICA	rs2596503	-0.39	7.4e-06	Brain - Nucleus accumbens (basal ganglia)
	MICA	rs2596503	-0.28	1.3e-05	Colon - Transverse
	MICA	rs2596503	-0.22	1.3e-05	Artery - Tibial
	MICA	rs2596503	-0.25	1.5e-05	Heart - Left Ventricle
	MICA	rs2596503	-0.35	3.8e-05	Artery - Coronary
	MICA	rs2596503	-0.17	6.2e-05	Lung
	MICA	rs2596503	-0.33	0.0001	Brain - Cortex
	MICA	rs2596503	-0.32	0.00012	Adrenal Gland
	MICA	rs2596503	-0.17	0.00032	Adipose - Subcutaneous
	MICA	rs3115663	0.31	4e-05	Cells - Cultured fibroblasts
	MICA	rs3130070	0.31	4e-05	Cells - Cultured fibroblasts
	MICA	rs3130623	0.31	1.3e-05	Cells - Cultured fibroblasts
	MICA	rs3130623	0.19	0.00021	Thyroid
	MICA	rs3131618	0.35	4.2e-07	Thyroid
	MICA	rs3131618	0.45	3.2e-06	Cells - Cultured fibroblasts
	MICA	rs3131618	0.35	2.8e-05	Heart - Atrial Appendage
	MICA	rs3131618	0.27	0.00026	Artery - Tibial
	MICB	rs10885	0.39	2.2e-13	Cells - Cultured fibroblasts
	MICB	rs10885	0.33	1.2e-11	Lung
	MICB	rs10885	0.41	1.8e-10	Artery - Tibial
	MICB	rs10885	0.4	5.9e-10	Skin - Not Sun Exposed (Suprapubic)
	MICB	rs10885	0.38	1.1e-09	Esophagus - Mucosa
	MICB	rs10885	0.34	3.5e-09	Muscle - Skeletal
	MICB	rs10885	0.34	1.6e-08	Adipose - Subcutaneous
	MICB	rs10885	0.44	4.9e-08	Artery - Aorta
	MICB	rs10885	0.31	9.9e-08	Skin - Sun Exposed (Lower leg)
	MICB	rs10885	0.38	1.6e-07	Nerve - Tibial
	MICB	rs10885	0.27	2.2e-07	Adipose - Visceral (Omentum)
	MICB	rs10885	0.72	3.3e-07	Vagina
	MICB	rs10885	0.31	8.8e-07	Esophagus - Muscularis
	MICB	rs10885	0.45	1.9e-06	Artery - Coronary
	MICB	rs10885	0.44	4.3e-06	Liver
	MICB	rs10885	0.46	1e-05	Brain - Cortex
	MICB	rs10885	0.2	2.2e-05	Thyroid
	MICB	rs10885	0.23	3.5e-05	Breast - Mammary Tissue
	MICB	rs10885	0.28	4.3e-05	Esophagus - Gastroesophageal Junction
	MICB	rs10885	0.37	4.4e-05	Pancreas
	MICB	rs10885	0.27	6.2e-05	Colon - Sigmoid
	MICB	rs10885	0.23	7.6e-05	Colon - Transverse
	MICB	rs10885	0.53	0.00011	Brain - Cerebellum
	MICB	rs2256965	0.67	7.5e-10	Brain - Cerebellar Hemisphere
	MICB	rs2256965	0.53	1e-07	Brain - Cerebellum
	MICB	rs2596503	0.57	1.1e-05	Brain - Cerebellar Hemisphere
	MICB	rs2596503	0.58	4e-05	Brain - Cerebellum
	MICB	rs2844484	0.64	1.4e-09	Brain - Cerebellum
	MICB	rs2844484	0.7	1.6e-09	Brain - Cerebellar Hemisphere
	MICB	rs2844484	0.23	3.8e-05	Testis
	MICB	rs2844484	0.21	0.0001	Skin - Not Sun Exposed (Suprapubic)
	MICB	rs3115663	0.39	2.2e-13	Cells - Cultured fibroblasts
	MICB	rs3115663	0.33	1.2e-11	Lung
	MICB	rs3115663	0.41	1.8e-10	Artery - Tibial
	MICB	rs3115663	0.4	5.9e-10	Skin - Not Sun Exposed (Suprapubic)
	MICB	rs3115663	0.38	1.1e-09	Esophagus - Mucosa
	MICB	rs3115663	0.34	3.5e-09	Muscle - Skeletal
	MICB	rs3115663	0.34	1.6e-08	Adipose - Subcutaneous
	MICB	rs3115663	0.44	4.9e-08	Artery - Aorta
	MICB	rs3115663	0.31	9.9e-08	Skin - Sun Exposed (Lower leg)
	MICB	rs3115663	0.38	1.6e-07	Nerve - Tibial
	MICB	rs3115663	0.27	2.2e-07	Adipose - Visceral (Omentum)
	MICB	rs3115663	0.72	3.3e-07	Vagina
	MICB	rs3115663	0.31	8.8e-07	Esophagus - Muscularis
	MICB	rs3115663	0.45	1.9e-06	Artery - Coronary
	MICB	rs3115663	0.44	4.3e-06	Liver
	MICB	rs3115663	0.46	1e-05	Brain - Cortex
	MICB	rs3115663	0.2	2.2e-05	Thyroid
	MICB	rs3115663	0.23	3.5e-05	Breast - Mammary Tissue
	MICB	rs3115663	0.28	4.3e-05	Esophagus - Gastroesophageal Junction
	MICB	rs3115663	0.37	4.4e-05	Pancreas
	MICB	rs3115663	0.27	6.2e-05	Colon - Sigmoid
	MICB	rs3115663	0.23	7.6e-05	Colon - Transverse
	MICB	rs3115663	0.53	0.00011	Brain - Cerebellum
	MICB	rs3130070	0.39	2.2e-13	Cells - Cultured fibroblasts
	MICB	rs3130070	0.33	1.2e-11	Lung
	MICB	rs3130070	0.41	1.8e-10	Artery - Tibial
	MICB	rs3130070	0.4	5.9e-10	Skin - Not Sun Exposed (Suprapubic)
	MICB	rs3130070	0.38	1.1e-09	Esophagus - Mucosa
	MICB	rs3130070	0.34	3.5e-09	Muscle - Skeletal
	MICB	rs3130070	0.34	1.6e-08	Adipose - Subcutaneous
	MICB	rs3130070	0.44	4.9e-08	Artery - Aorta
	MICB	rs3130070	0.31	9.9e-08	Skin - Sun Exposed (Lower leg)
	MICB	rs3130070	0.38	1.6e-07	Nerve - Tibial
	MICB	rs3130070	0.27	2.2e-07	Adipose - Visceral (Omentum)
	MICB	rs3130070	0.72	3.3e-07	Vagina
	MICB	rs3130070	0.31	8.8e-07	Esophagus - Muscularis
	MICB	rs3130070	0.45	1.9e-06	Artery - Coronary
	MICB	rs3130070	0.44	4.3e-06	Liver
	MICB	rs3130070	0.46	1e-05	Brain - Cortex
	MICB	rs3130070	0.2	2.2e-05	Thyroid
	MICB	rs3130070	0.23	3.5e-05	Breast - Mammary Tissue
	MICB	rs3130070	0.28	4.3e-05	Esophagus - Gastroesophageal Junction
	MICB	rs3130070	0.37	4.4e-05	Pancreas
	MICB	rs3130070	0.27	6.2e-05	Colon - Sigmoid
	MICB	rs3130070	0.23	7.6e-05	Colon - Transverse
	MICB	rs3130070	0.53	0.00011	Brain - Cerebellum
	MICB	rs3130623	0.37	1.3e-12	Cells - Cultured fibroblasts
	MICB	rs3130623	0.3	3e-10	Lung
	MICB	rs3130623	0.39	5.1e-10	Artery - Tibial
	MICB	rs3130623	0.36	4.1e-09	Esophagus - Mucosa
	MICB	rs3130623	0.37	5.7e-09	Skin - Not Sun Exposed (Suprapubic)
	MICB	rs3130623	0.32	1e-08	Muscle - Skeletal
	MICB	rs3130623	0.33	3.2e-08	Adipose - Subcutaneous
	MICB	rs3130623	0.41	2.1e-07	Artery - Aorta
	MICB	rs3130623	0.36	3.2e-07	Nerve - Tibial
	MICB	rs3130623	0.26	3.2e-07	Adipose - Visceral (Omentum)
	MICB	rs3130623	0.69	5.7e-07	Vagina
	MICB	rs3130623	0.28	6e-07	Skin - Sun Exposed (Lower leg)
	MICB	rs3130623	0.45	1.5e-06	Artery - Coronary
	MICB	rs3130623	0.29	2.8e-06	Esophagus - Muscularis
	MICB	rs3130623	0.41	9.3e-06	Liver
	MICB	rs3130623	0.46	1.1e-05	Brain - Cortex
	MICB	rs3130623	0.22	4.5e-05	Breast - Mammary Tissue
	MICB	rs3130623	0.36	6.4e-05	Pancreas
	MICB	rs3130623	0.18	8.9e-05	Thyroid
	MICB	rs3130623	0.23	9.3e-05	Colon - Transverse
	MICB	rs3130623	0.53	0.00011	Brain - Cerebellum
	MICB	rs3130623	0.25	0.00015	Colon - Sigmoid
	MICB	rs3130623	0.26	0.00015	Esophagus - Gastroesophageal Junction
	MICB	rs3130623	0.28	0.00021	Testis
	MICB	rs3131618	0.73	5.5e-21	Esophagus - Mucosa
	MICB	rs3131618	0.85	4.5e-19	Artery - Aorta
	MICB	rs3131618	0.68	8.9e-17	Artery - Tibial
	MICB	rs3131618	0.66	3.2e-16	Skin - Not Sun Exposed (Suprapubic)
	MICB	rs3131618	0.59	3.7e-16	Skin - Sun Exposed (Lower leg)
	MICB	rs3131618	0.51	9.7e-13	Cells - Cultured fibroblasts
	MICB	rs3131618	1.2	2.1e-12	Brain - Cerebellum
	MICB	rs3131618	0.99	1.7e-10	Brain - Cerebellar Hemisphere
	MICB	rs3131618	0.4	1.4e-09	Adipose - Visceral (Omentum)
	MICB	rs3131618	0.48	2.2e-09	Esophagus - Muscularis
	MICB	rs3131618	0.47	4.5e-09	Adipose - Subcutaneous
	MICB	rs3131618	0.44	5.4e-09	Muscle - Skeletal
	MICB	rs3131618	0.54	6.4e-09	Nerve - Tibial
	MICB	rs3131618	0.47	7.3e-09	Esophagus - Gastroesophageal Junction
	MICB	rs3131618	0.46	2.8e-08	Stomach
	MICB	rs3131618	0.87	6.8e-08	Vagina
	MICB	rs3131618	0.33	6.9e-08	Lung
	MICB	rs3131618	0.53	1.4e-07	Testis
	MICB	rs3131618	0.32	1.6e-07	Thyroid
	MICB	rs3131618	0.36	4.4e-07	Colon - Transverse
	MICB	rs3131618	0.6	4.6e-07	Artery - Coronary
	MICB	rs3131618	0.61	4.9e-07	Liver
	MICB	rs3131618	0.35	7.6e-07	Breast - Mammary Tissue
	MICB	rs3131618	0.79	2.2e-06	Uterus
	MICB	rs3131618	0.39	2.3e-06	Colon - Sigmoid
	MICB	rs3131618	0.6	4e-06	Brain - Cortex
	MICB	rs3131618	0.54	1.2e-05	Pancreas
	MICB	rs3131618	0.52	2.3e-05	Brain - Frontal Cortex (BA9)
	MICB	rs3131618	0.36	7.5e-05	Heart - Atrial Appendage
	MICB	rs3132468	0.53	2.4e-32	Cells - Cultured fibroblasts
	MICB	rs3132468	0.34	1.4e-23	Whole Blood
	MICB	rs3132468	0.29	6.5e-12	Lung
	MICB	rs3132468	0.37	5.4e-11	Esophagus - Mucosa
	MICB	rs3132468	0.3	1.1e-09	Colon - Transverse
	MICB	rs3132468	0.47	2.7e-09	Liver
	MICB	rs3132468	0.34	4e-09	Skin - Not Sun Exposed (Suprapubic)
	MICB	rs3132468	0.66	7.6e-09	Brain - Cerebellum
	MICB	rs3132468	0.44	1.2e-08	Spleen
	MICB	rs3132468	0.28	1.6e-08	Skin - Sun Exposed (Lower leg)
	MICB	rs3132468	0.26	1.9e-06	Stomach
	MICB	rs3132468	0.28	2.5e-06	Nerve - Tibial
	MICB	rs3132468	0.54	3.6e-06	Brain - Cerebellar Hemisphere
	MICB	rs3132468	0.42	4.7e-06	Cells - EBV-transformed lymphocytes
	MICB	rs3132468	0.23	1.8e-05	Artery - Tibial
	MICB	rs3132468	0.25	1.9e-05	Esophagus - Gastroesophageal Junction
	MICB	rs3132468	0.35	4e-05	Adrenal Gland
	MICB	rs3132468	0.19	0.00028	Adipose - Subcutaneous
	MICB	rs3134899	0.34	2e-11	Cells - Cultured fibroblasts
	MICB	rs3134899	0.72	5.1e-10	Brain - Cerebellum
	MICB	rs3134899	0.66	1.8e-08	Brain - Cerebellar Hemisphere
	MICB	rs3134899	0.39	2.1e-06	Liver
	MICB	rs3134899	0.15	3.1e-05	Whole Blood
	MICB	rs3134899	0.23	0.00016	Skin - Not Sun Exposed (Suprapubic)
	NFKBIL1	rs2256965	0.1	2.5e-05	Adipose - Subcutaneous
	NFKBIL1	rs3132468	0.095	0.00012	Whole Blood
	NFKBIL1	rs3134899	0.099	0.00011	Whole Blood
	POU5F1B	rs6983267	0.2	8.2e-06	Colon - Transverse
	POU5F1B	rs7014346	0.23	2.5e-07	Colon - Transverse
	POU5F1B	rs7842552	-0.21	3.9e-06	Colon - Transverse
	TERT	rs10073340	-0.26	0.00011	Skin - Sun Exposed (Lower leg)
	TERT	rs2735948	0.25	2.1e-08	Esophagus - Mucosa
	TERT	rs2736100	0.23	4.8e-05	Skin - Not Sun Exposed (Suprapubic)
	TERT	rs31489	-0.29	7.1e-12	Esophagus - Mucosa
	TERT	rs380286	-0.31	5e-14	Esophagus - Mucosa
	TERT	rs401681	-0.31	6.1e-14	Esophagus - Mucosa
	TERT	rs421284	-0.31	7.6e-15	Esophagus - Mucosa
	TERT	rs421629	-0.3	7.1e-13	Esophagus - Mucosa
	TERT	rs452384	-0.32	4e-15	Esophagus - Mucosa
	TERT	rs452932	-0.31	7.6e-15	Esophagus - Mucosa
	TERT	rs465498	-0.31	1.5e-14	Esophagus - Mucosa
	TERT	rs467095	-0.3	1.8e-13	Esophagus - Mucosa
	TERT	rs4975615	0.29	5e-12	Esophagus - Mucosa
	TERT	rs4975616	0.3	4.3e-13	Esophagus - Mucosa
	TERT	rs6554759	0.23	8.2e-05	Esophagus - Mucosa
